# Supplementary material
Source: PubMed Central journal article supplement (PMC3129182)
Supplement: supp_M111.223289_jbc.M111.223289-1.pdf [file supp_M111.223289_jbc.M111.223289-1.pdf]

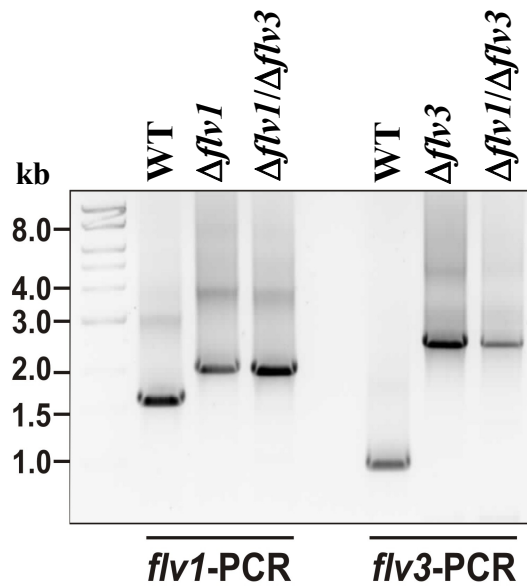

**Figure S1. Verification of Flv protein double-mutant  $\Delta flv1/\Delta flv3$  in *Synechocystis*.** PCR was performed using isolated genomic DNA from WT,  $\Delta flv1$ ,  $\Delta flv3$  single-mutants or  $\Delta flv1/\Delta flv3$  double-mutant and specific primers for *flv1* and *flv3*, respectively. Expected fragment lengths for WT are 1.6 kb for *flv1* and 0.9 kb for *flv3*. Expected fragment lengths for mutant alleles are 2.0 kb for *flv1* and 2.6 kb for *flv3*.

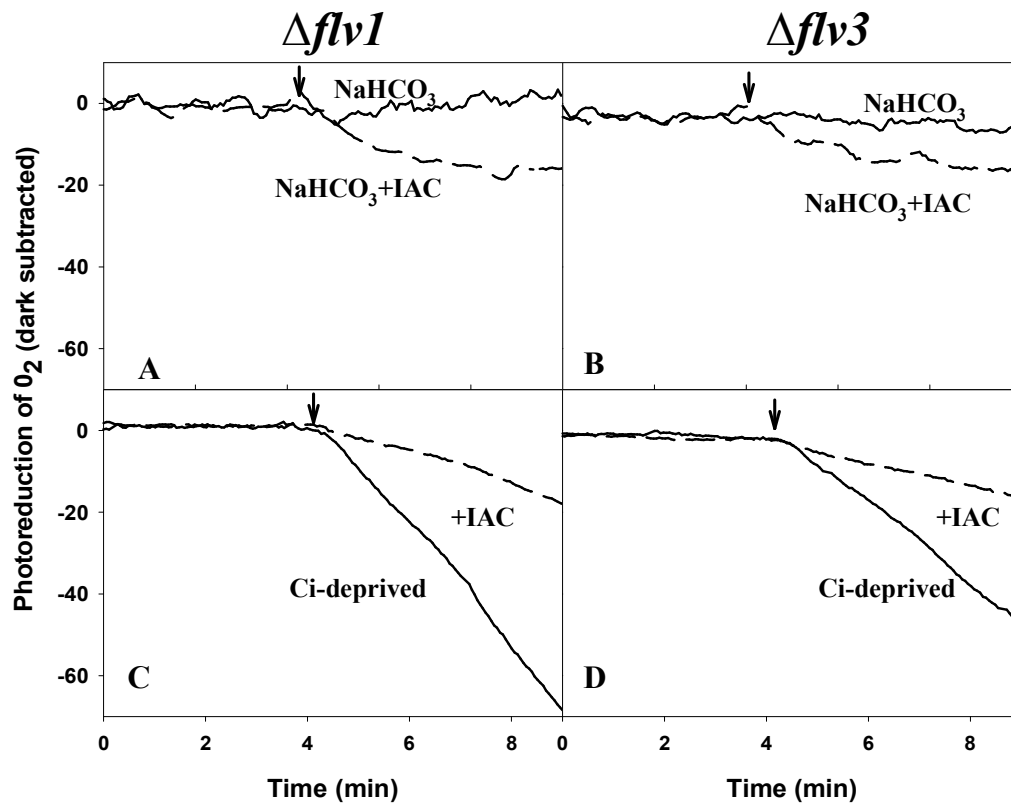

**Figure S2. Effect of IAC on photoreduction of O<sub>2</sub> in the  $\Delta flv1$  and  $\Delta flv3$  mutant cells.** O<sub>2</sub> photoreduction was monitored in the presence of 5mM NaHCO<sub>3</sub> (solid line) and in the presence of both 5 mM NaHCO<sub>3</sub> and 8 mM IAC (dashed line) from the  $\Delta flv1$  (A) and  $\Delta flv3$  mutant cells (B). Similar measurements were performed from the  $\Delta flv1$  (C) and  $\Delta flv3$  (D) cells after Ci-deprivation. Arrays show turning on the light. Cumulative O<sub>2</sub> uptake curve was calculated from <sup>18</sup>O<sub>2</sub>/<sup>16</sup>O<sub>2</sub> exchange measurements and is presented here after subtraction of dark O<sub>2</sub> uptake rate for better legibility.

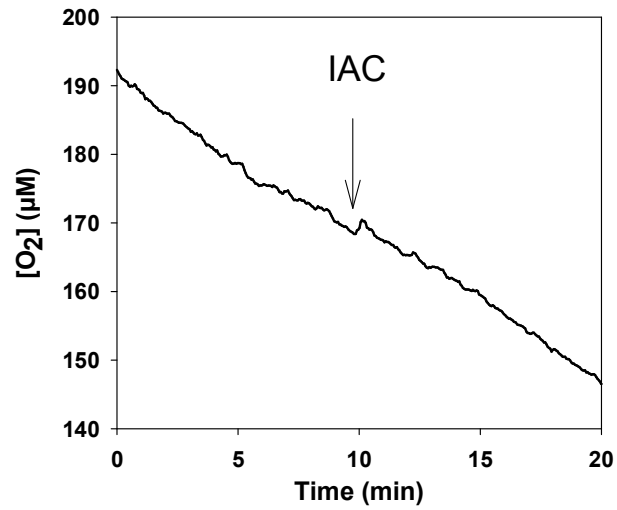

**Figure S3. Effect of IAC on dark respiration.**

Array shows the addition of 8 mM IAC to  $\Delta flv1/\Delta flv3$  cells in the darkness.

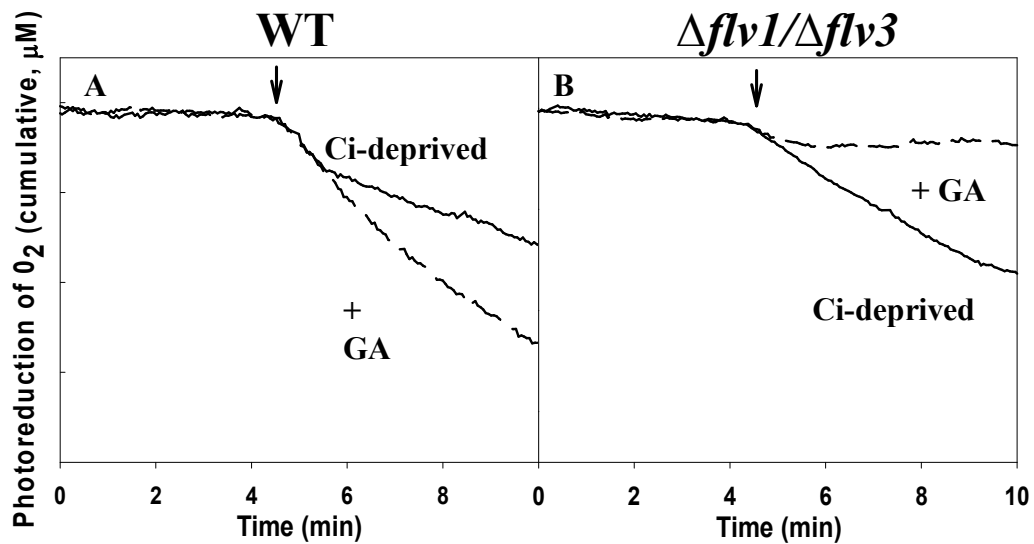

**Figure S4. Effect of glycolaldehyde (GA) on photoreduction of O<sub>2</sub> in the WT and  $\Delta flv1/\Delta flv3$  cells.** O<sub>2</sub> photoreduction was monitored from the WT (A) and  $\Delta flv1/\Delta flv3$  (B) cells after Ci-deprivation (solid line) and after addition of 10 mM glycolaldehyde (GA) to the Ci-deprived cells (dashed line). Arrays show turning on the light. Cumulative O<sub>2</sub> uptake curve was calculated from <sup>18</sup>O<sub>2</sub>/<sup>16</sup>O<sub>2</sub> exchange measurements and is presented here after subtraction of dark O<sub>2</sub> uptake rate for better legibility.
